## **The effect of health insurance coverage on antenatal care utilization in Cambodia: A secondary analysis of Cambodia Demographic and Health Survey 2021-2022**

Samnang Um<sup>1,2\*</sup>, Channnarong Phan<sup>1</sup>, Leng Dany<sup>3</sup>, Khun Vaha<sup>4</sup>, Soklim Pay<sup>5</sup>, Darapheak Chau<sup>1</sup>

1- National Institute of Public Health, Cambodia

2- Faculty of Social Science and Humanities, Royal University of Phnom Penh, Cambodia

3- The Elite Angkor Clinic, Siem Reap, Cambodia

4- Department of Payment Certification of National Payment Certification Agency, Cambodia

5- Technical Department of National Pediatric Hospital, Cambodia

\* [umsam nang56@gmail.com](mailto:umsam nang56@gmail.com)

### **Abstract**

Health insurance is essential in reducing or eliminating the financial constraint to accessing maternal health services caused by out-of-pocket payments. Also, it has a beneficial effect in minimizing the number of maternal and child mortality. However, limited studies in Cambodia examined the association between health insurance coverage on antenatal care (ANC) utilization. Therefore, this study have examined the effect of health insurance coverage on ANC utilization in Cambodia. The study utilized data from the 2021-2022 Cambodia Demographic and Health Surveys (CDHS). A total of 3,162 weighted women who gave birth within two years were included in the study. Multiple logistic regression analysis was explored to assess the association between health insurance coverage with women who attended four or more ANC visits. About 24.9% of the women had health insurance coverage during 2021-2022. Most (86.1%) of women attended four or more ANC visits. Women with health insurance coverage were statistically significantly associated with attending four or more ANC visits with an adjusted odds ratio (AOR = 1.6; 95% CI: 1.1–2.4). Other factors significantly associated with attending four or more ANC visits include women with higher education (AOR = 3.1; 95% CI: 1.2–7.7), secondary education (AOR = 2.3; 95% CI: 1.5–3.5), richest households (AOR = 3.2; 95% CI: 1.5-6.8), and richer households (AOR = 1.9;95% CI: 1.2-2.8). Pregnant women with health insurance coverage, who had completed at least secondary education and had a better wealth index were more likely to attend at least four ANC visits. Thus, providing health insurance coverage and improving women’s economic and educational may be essential to improving women's access to maternal health services in Cambodia.

**Key work:** Health insurance, Antenatal care utilization, Pregnant women, Cambodia

36

## 37 **Introduction**

38

39 Cambodia's maternal mortality rate has significantly declined in the past decade. Data from the  
40 2021-2022 Cambodia Demographic and Health Surveys (CDHS) show that maternal mortality  
41 had declined dramatically, from 488 to 154 per 100,000 live births between 2000 and 2021-2022  
42 [1,2]. By 2030, the global maternal death ratio is expected to drop to less than 70 per 100,000  
43 live births, according to Sustainable Development Goal (SDG) 3.1[3]. This achievement can be  
44 attributed to the country's concerted effort to increase women's access to maternal health services,  
45 particularly the initiative to increase institutional births [4]. Institutional births dramatically  
46 increased, from 19.3% to 98%, while the proportion of pregnant women attending four or more  
47 antenatal care (ANC) appointments increased considerably, from 9% to 86.1%, between 2000  
48 and 2021-2022 [5]. In several studies, women who had health insurance had higher rates of using  
49 maternal health treatments, such as timely ANC and attending four or more ANC visits [6-9].

50

51 In 2019, the total population of Cambodia was 15.55 million, with 17.8% living below the  
52 national poverty line [10]. Since 2016, Cambodia has been classified as a lower-middle-income  
53 country, with gross domestic product (GDP) per capita from 302 US dollars in 2000 to 1,625 US  
54 dollars in 2021 [11]. Also, current expenditures on health per capita significantly increased from  
55 20 US dollars in 2000 to 116 US dollars in 2020 [12]. Globally, 50% of people cannot access  
56 essential health services, as the World Bank and World Health Organization (WHO) reported in  
57 2017 [13].

58

59 Cambodian National Social Security Fund (NSSF) has provided health insurance coverage to  
60 formal sector workers [14]. And poor households are covered by the Health Equity Fund (HEF),  
61 the co-financing mechanism of the government and development partners [15]. By 2025, the  
62 government intends to expand the reach of the NSSF health insurance program to include the  
63 entire population [16]. Data from CDHS 2021-2022 indicated that 22% of women and 13% of  
64 men aged 15-49 years have any health insurance, respectively [5]. Health insurance coverage is  
65 expected to provide financial risk protection and reduce disparities in access by facilitating  
66 greater uptake of maternal health services [13]. To our knowledge, limited published peer-  
67 reviewed studies assess the association between health insurance coverage and access to

68 maternal health services among women of reproductive age in Cambodia using updated data.  
69 One prior study on health insurance coverage and its impact on maternal healthcare utilization in  
70 low- and middle-income countries utilized data from CDHS 2010 [8]. This study included all  
71 women and men aged 15-49 and pooled Demographic and Health Survey (DHS) data in 30 low-  
72 and middle-income countries (LMICs) [8]. An additional study aimed to assess levels of health  
73 insurance coverage in 30 LMICs and examines the impact of health insurance status on the use  
74 of maternal health care in eight countries spanning sub-Saharan Africa (Burundi et al., Namibia,  
75 and Rwanda), West Asia (Albania), and South and Southeast Asia (Cambodia and Indonesia) [8].  
76 Several pieces of evidence on the effect of health insurance coverage on ANC utilization have  
77 been published [6-9,17-19]. The results indicate that women with health insurance coverage had  
78 higher odds of attending four or more ANC visits than those without health insurance coverage  
79 [6-9,17-19]. Moreover, those women who reported exposure to media, married women, those  
80 with high education, those living in wealthy economic families, those who are unemployed, and  
81 those living in urban areas were more likely to attend four or more ANC visits [6-9,17-19].  
82 Given the lack of scholarship addressing this health concern among Cambodian women aged 15-  
83 49, we examined the effects of health insurance coverage on ANC utilization among women who  
84 had a live birth in the past two years in Cambodia. The findings will provide a broader  
85 perspective on levels of health insurance coverage and the impact of health insurance status on  
86 the use of maternal health care in Cambodia. Additionally, the study will enable policymakers to  
87 understand better health insurance coverage among the adult population in Cambodia and proffer  
88 suggestions for improving universal health coverage in Cambodia.

89

## 90 **Material and Methods**

91

### 92 **Ethical statement**

93

94 The CDHS 2021–2022 is publicly available, with all personal identifiers of study participants  
95 removed. Permission to analyze the data was granted by registering with the DHS program  
96 website at (URL: <https://dhsprogram.com/data/available-datasets.cfm>). Written informed consent  
97 was obtained from the parent/guardian of each participant under 18 before data collection. The  
98 Cambodia National Ethics Committee for Human Health Research (NECHR) approved the data

99 collection tools and procedures for CHDS 2021-2022 for Health Research on 10 May 2021  
100 (Reference number: 83 NECHR) and ICF's Institutional Review Board (IRB) in Rockville,  
101 Maryland, USA.

102

### 103 **Data source**

104

105 We used data from the most recent CDHS (2021–2022), a household survey conducted every  
106 five years nationally representative of the population [5]. The two-stage stratified cluster  
107 sampling method collected the samples from all provinces. At the first stage, clusters, or  
108 enumeration areas (EAs), that represent the entire country (urban and rural), are randomly  
109 selected from the sampling frame using probability proportional (PPS) to cluster size. In the  
110 second stage, a complete listing of households was selected from each cluster using an equal  
111 probability systematic sampling, and then interviews were conducted with women aged 15–49  
112 years who were born in the five years preceding the survey in the complete list selected  
113 households [5]. In total, 19,496 women aged 15-49 who had given birth in the last five years  
114 were interviewed face-to-face, using the survey standard questionnaire to collect information  
115 from women on several health indicators such as maternal health care service utilization,  
116 maternal and child health, nutrition, and reproductive health services [5]. Overall, 15,046 women  
117 who had not given birth in the past two years were excluded. Data restriction resulted in women  
118 who had a live birth in the past two years in a final analytic sample of 3,292 women (3,162  
119 weighted women).

120

### 121 **Measurements**

122

#### 123 **Outcome variable**

124

125 This study's outcome was the number of ANC visits during the last pregnancy among women  
126 aged 15-49 years (coded as 0 = less than 4 ANC visits including women who reported no ANC  
127 visits and 1 = four or more ANC visits) [6,18,20].

128

#### 129 **Independent variables**

130

131 The primary independent variable is maternal health insurance coverage (coded as 0 = no  
132 (reference and 1=yes), including public and private insurance. The confounding variables

133 included maternal factors: Women's age in years (coded as 1=15-30 (reference) and 2=31-49),  
134 marital status (coded as 1=married (reference) and 2=not married), birth order (coded as 1=1  
135 (reference), 2=2-3, and 3=4 or more), education (coded as 0 = no education (reference),  
136 1=primary, and 2=secondary or higher), occupation (coded as 0=not working (reference),  
137 1=professional, 2=sales or services, 3=agricultural, and 4=manual labor). Individual household  
138 factors included the household wealth index (coded as 1=poorest (reference), 2=poorest,  
139 3=medium, 4=richer, and 5=richest) were calculated following the principal component analysis  
140 (PCA) [5]. Cambodia's geographical regions were grouped into four categories (coded as  
141 1=Plains (reference), 2=Tonle Sap, 3=Coastal/Sea, and 4=Mountains), and place of residences  
142 (coded as 1=urban (reference) and 2=rural) was defined based on Cambodia's General  
143 Population Census 2019 and adapted from the original CDHS 2021-2022 [5,10].

144

#### 145 **Statistical analysis**

146

147 Statistical analysis was performed using STATA version 17 (StataCorp LLC). We applied for the  
148 DHS standard sampling weight variable (**v005/1,000,000**). Then, we used the survey-specific  
149 STATA command "**svy**" for descriptive and analytical analysis. Women's socio-economic and  
150 demographic characteristics were described using weighted frequency and percentage  
151 distributions.

152 Bivariate analysis using Chi-square tests assessed the association between the variables of  
153 interest (maternal and individual household characteristics) and ANC visits. All independent  
154 variables associated with ANC use at p-value  $\leq 0.10$ , or that had a potential confounder variable  
155 [6,18] were included in the multiple logistic regression analysis to determine the independent  
156 factors related to ANC use [26]. Multicollinearity between original independent variables was  
157 checked, including women's age, number of children ever born, education, wealth index,  
158 occupation, marital status, health insurance coverage, and place of residence. The result of the  
159 evaluating variance inflation factor (VIF) scores after fitting an Ordinary Least Squares  
160 regression model with the mean value of VIF was 1.53, which is less than the cutoff point  
161 indicating no collinearity correlation among the independent variables [27].

162

163 **Results**

164

165 **Characteristics of the study population**

166

167 **Table 1** describes the socio-economic and demographic characteristics of the 3,162 women aged  
 168 15–49. The mean age was 22.2 years old (SD = 4.2 years); the age group of 15–29 years old  
 169 accounted for 94.3%. The majority (95%) were currently married. More than 33.4% of women  
 170 had their first child. Half of the women completed at least secondary education, while 10.6% had  
 171 no formal education. Only 6.5% of workers were professionals, and 31.2% were unemployed. Of  
 172 the sample, 20.7% of women were from the poorest households, and 19.7% were from poorer  
 173 households. Sixty-two percent of the women lived in rural areas. Only 786 (24.9%) women aged  
 174 15–49 had health insurance coverage. 86.1% of women attended at least four ANC visits during  
 175 pregnancy.

176

177 **Table 1.** Socio-economic and demographic characteristics of women (N = 3,162 weighted)

178

| Variables                                 | Freq.     | %    |
|-------------------------------------------|-----------|------|
| <b>Mean age at the time of birth (SD)</b> | 22.2(4.2) |      |
| 15-29                                     | 2,982     | 94.3 |
| 30-49                                     | 180       | 5.7  |
| <b>Marital status</b>                     |           |      |
| Married                                   | 3,004     | 95.0 |
| Not married                               | 158       | 5.0  |
| <b>Birth order</b>                        |           |      |
| 1 <sup>st</sup> child                     | 1055      | 33.4 |
| 2 <sup>nd</sup> or 3 <sup>rd</sup> child  | 1197      | 37.9 |
| 4 <sup>th</sup> child or higher           | 910       | 28.7 |
| <b>Educational</b>                        |           |      |
| No education                              | 334       | 10.6 |
| Primary                                   | 1253      | 39.6 |
| Secondary                                 | 1361      | 43.0 |
| Higher                                    | 214       | 6.8  |
| <b>Occupation (N=3,100)</b>               |           |      |
| Not working                               | 986       | 31.2 |
| Professional                              | 205       | 6.5  |
| Sales                                     | 579       | 18.3 |
| Agricultural                              | 445       | 14.1 |
| Services                                  | 76        | 2.4  |
| Manual labor                              | 810       | 25.6 |
| <b>Wealth index</b>                       |           |      |
| Poorest                                   | 655       | 20.7 |
| Poorer                                    | 623       | 19.7 |

|                                    |      |             |
|------------------------------------|------|-------------|
| Middle                             | 626  | 19.8        |
| Richer                             | 683  | 21.6        |
| Richest                            | 574  | 18.2        |
| <b>Residence</b>                   |      |             |
| Urban                              | 1202 | 38.0        |
| Rural                              | 1960 | 62.0        |
| <b>Region</b>                      |      |             |
| Plain                              | 1532 | 48.5        |
| Tonle Sap                          | 996  | 31.5        |
| Coastal                            | 201  | 6.4         |
| Plateau/Mountain                   | 432  | 13.7        |
| <b>Covered by health insurance</b> |      |             |
| No                                 | 2376 | 75.1        |
| Yes                                | 786  | 24.9        |
| <b>Number of ANC visits</b>        |      |             |
| < 4 ANC                            | 440  | 13.9        |
| ≥ 4 ANC                            | 2722 | <b>86.1</b> |

179

180

181

182

183

184

185

186

187

### Factors Associated with Four or more ANC visits in Chi-Square analysis

188

189

190

191

192

193

194

195

196

197

198

199

200

201

202

203

204

In bivariate analysis (**Table 3**), a higher proportion of women with health insurance coverage had a significant association with four or more ANC visits (91.6% vs. 84.2%,  $p < 0.001$ ). Women aged 31–49 reported being more likely to attend four or more ANC visits (88.0% vs. 86.0%,  $p < 0.001$ ). Also, married women reported four or more ANC visits than nonmarried women (86.6% vs. 76.2%,  $p = 0.007$ ). Women with no education were less likely to attend four or more ANC visits than those with higher education (71.0% vs. 95.6%,  $p < 0.001$ ). Four or more ANC visits were higher among women working in professional (95.3%) and service (96.4%), respectively, compared to unemployed women (84.3), with  $p < 0.001$ ). Additionally, four or more ANC visits were higher among women from the richer and richest on the wealth index (94.8 and 89.4%, respectively), compared to the poorer and poorest (73.9 and 86.9%, respectively, with  $p < 0.001$ ). Lastly, women living in urban areas reported higher four or more ANC visits than in rural areas (91.5 vs. 82.7%,  $p < 0.001$ ).

205 **Table 3.** Maternal and household characteristics by women attending at least four antenatal care and delivery  
 206 in a health facility (N = 3,162)  
 207

| Variables                                | Number of ANC visits    |                         | p-value |
|------------------------------------------|-------------------------|-------------------------|---------|
|                                          | Four or more<br>n=2,722 | Less than four<br>n=440 |         |
|                                          | %                       | %                       |         |
| <b>Covered by health insurance</b>       |                         |                         |         |
| No                                       | 84.2                    | 15.8                    | <0.001  |
| Yes                                      | 91.6                    | 8.4                     |         |
| <b>Age at time of birth</b>              |                         |                         |         |
| 15-30                                    | 86.0                    | 14.0                    | <0.001  |
| 31-49                                    | 88.0                    | 12.0                    |         |
| <b>Marital status</b>                    |                         |                         |         |
| Married                                  | 86.6                    | 13.4                    | 0.007   |
| Not married                              | 76.2                    | 23.8                    |         |
| <b>Birth order</b>                       |                         |                         |         |
| 1 <sup>st</sup> child                    | 88.4                    | 11.6                    | <0.001  |
| 2 <sup>nd</sup> or 3 <sup>rd</sup> child | 88.6                    | 11.4                    |         |
| 4 <sup>th</sup> child or higher          | 80.1                    | 19.9                    |         |
| <b>Educational</b>                       |                         |                         |         |
| No education                             | 71.0                    | 29.0                    | <0.001  |
| Primary                                  | 84.1                    | 15.9                    |         |
| Secondary                                | 90.1                    | 9.9                     |         |
| Higher                                   | 95.6                    | 4.4                     |         |
| <b>Occupation (N=3,100)</b>              |                         |                         |         |
| Not working                              | 84.3                    | 15.7                    | <0.001  |
| Professional                             | 95.3                    | 4.7                     |         |
| Sales                                    | 84.4                    | 15.6                    |         |
| Agricultural                             | 79.0                    | 21.0                    |         |
| Services                                 | 96.4                    | 3.6                     |         |
| Manual labor                             | 89.9                    | 10.1                    |         |
| <b>Wealth index</b>                      |                         |                         |         |
| Poorest                                  | 73.9                    | 26.1                    | <0.001  |
| Poorer                                   | 86.9                    | 13.1                    |         |
| Middle                                   | 86.3                    | 13.7                    |         |
| Richer                                   | 89.4                    | 10.6                    |         |
| Richest                                  | 94.8                    | 5.2                     |         |
| <b>Residence</b>                         |                         |                         |         |
| Urban                                    | 91.5                    | 8.5                     | <0.001  |
| Rural                                    | 82.7                    | 17.3                    |         |
| <b>Region</b>                            |                         |                         |         |
| Plain                                    | 89.3                    | 10.7                    | <0.001  |
| Tonle Sap                                | 86.6                    | 13.4                    |         |
| Coastal                                  | 89.0                    | 11.0                    |         |
| Plateau/Mountain                         | 72.2                    | 27.8                    |         |



208 **Notes:** Survey weights are applied to obtain weighted percentages. \***Plains:** Phnom Penh, Kampong Cham, Tbong Khmum, Kandal,  
209 Prey Veng, Svay Rieng, and Takeo; **Tonle Sap:** Banteay Meanchey, Kampong Chhnang, Kampong Thom, Pursat, Siem Reap,  
210 Battambang, Pailin, and Otdar Meanchey; **Coastal/sea:** Kampot, Kep, Preah Sihanouk, and Koh Kong; **Mountains:** Kampong Speu,  
211 Kratie, Preah Vihear, Stung Treng, Mondul Kiri, and Ratanak Kiri.  
212  
213  
214  
215

216 **Association between health insurance and maternal Healthcare Services Utilization**  
 217

218 **Table 4** shows the results of the multiple logistic regression analysis of the association between  
 219 health insurance coverage and maternal healthcare services utilization after controlling for the  
 220 socio-demographic factors. Compared to women without health insurance, those with health  
 221 insurance coverage were more likely to attend four or more ANC visits (AOR = 1.6, 95% CI:  
 222 1.1–2.4). Women with higher education (AOR = 3.1, 95% CI: 1.2–7.7), secondary education  
 223 (AOR = 2.3, 95% CI: 1.5–3.5), and primary education (AOR = 1.7, 95% CI: 1.2–2.7) were more  
 224 likely to have four or more ANC visits than women without any formal education. The odds of  
 225 having four or more ANC visits were more significant for women from the wealthiest households  
 226 than for those from the poorest households: richest households (AOR = 3.2; 95% CI: 1.5-6.8),  
 227 richer households (AOR = 1.9; 95% CI: 1.2-2.8), and middle households (AOR = 1.5; 95% CI:  
 228 1.1-2.2). However, the odds of having four or more ANC visits were lower in unmarried women  
 229 than in married women (AOR = 0.5; 95% CI: 0.3-0.8).

230  
 231 **Table 4.** Association between health insurance and four or more ANC visits in simple and multiple  
 232 logistic regression model

| Variables                                | Four or more ANC visits |            |                          |                  |
|------------------------------------------|-------------------------|------------|--------------------------|------------------|
|                                          | Unadjusted (N = 3,162)  |            | Adjusted (N=3,100)       |                  |
|                                          | OR                      | 95% CI     | AOR                      | 95% CI           |
| <b>Covered by health insurance</b>       |                         |            |                          |                  |
| No                                       | Ref.                    |            | Ref.                     |                  |
| Yes                                      | 2.0 <sup>***</sup>      | (1.4-2.9)  | <b>1.6*</b>              | <b>(1.1-2.4)</b> |
| <b>Age at time of birth</b>              |                         |            |                          |                  |
| 15-30                                    | Ref.                    |            | Ref.                     |                  |
| 31-49                                    | 1.2                     | (0.7-2.1)  | 1.1                      | (0.6-2.0)        |
| <b>Marital status</b>                    |                         |            |                          |                  |
| Married                                  | Ref.                    |            | Ref.                     |                  |
| Not married                              | 0.5 <sup>**</sup>       | (0.3-0.8)  | <b>0.5<sup>**</sup></b>  | <b>(0.3-0.8)</b> |
| <b>Birth order</b>                       |                         |            |                          |                  |
| 1 <sup>st</sup> child                    | Ref.                    |            | Ref.                     |                  |
| 2 <sup>nd</sup> or 3 <sup>rd</sup> child | 1.0                     | (0.8-1.4)  | 1.1                      | (0.8-1.5)        |
| 4 <sup>th</sup> child or higher          | 0.5 <sup>***</sup>      | (0.4-0.7)  | 0.7*                     | (0.5-1.0)        |
| <b>Educational</b>                       |                         |            |                          |                  |
| No education                             | Ref.                    |            | Ref.                     |                  |
| Primary                                  | 2.2 <sup>***</sup>      | (1.5-3.1)  | <b>1.8<sup>**</sup></b>  | <b>(1.2-2.7)</b> |
| Secondary                                | 3.7 <sup>***</sup>      | (2.6-5.3)  | <b>2.3<sup>***</sup></b> | <b>(1.5-3.5)</b> |
| Higher                                   | 8.9 <sup>***</sup>      | (4.3-18.3) | <b>3.1*</b>              | <b>(1.2-7.7)</b> |
| <b>Occupation (N = 3,100)</b>            |                         |            |                          |                  |
| Not working                              | Ref.                    |            | Ref.                     |                  |
| Professional                             | 3.8 <sup>***</sup>      | (2.0-7.0)  | 1.4                      | (0.7-2.8)        |

|                     |        |            |        |           |
|---------------------|--------|------------|--------|-----------|
| Sales               | 1.0    | (0.7-1.4)  | 0.7    | (0.5-1.0) |
| Agricultural        | 0.7*   | (0.5-1.0)  | 1.0    | (0.7-1.4) |
| Services            | 4.9**  | (1.8-13.5) | 2.6    | (0.9-7.2) |
| Manual labor        | 1.7**  | (1.2-2.3)  | 1.3    | (0.9-1.9) |
| <b>Wealth index</b> |        |            |        |           |
| Poorest             | Ref.   |            | Ref.   |           |
| Poorer              | 2.4*** | (1.7-3.2)  | 1.7**  | (1.2-2.3) |
| Middle              | 2.2*** | (1.6-3.1)  | 1.5*   | (1.1-2.2) |
| Richer              | 3.0*** | (2.1-4.2)  | 1.9**  | (1.2-2.8) |
| Richest             | 6.4*** | (3.4-12.0) | 3.2**  | (1.5-6.8) |
| <b>Residence</b>    |        |            |        |           |
| Urban               | Ref.   |            | Ref.   |           |
| Rural               | 0.4*** | (0.3-0.6)  | 0.8    | (0.5-1.1) |
| <b>Region</b>       |        |            |        |           |
| Plain               | Ref.   |            | Ref.   |           |
| Tonle Sap           | 0.8    | (0.6-1.1)  | 1.2    | (0.9-1.7) |
| Coastal             | 1.0    | (0.6-1.5)  | 1.3    | (0.8-2.1) |
| Plateau/Mountain    | 0.3*** | (0.2-0.4)  | 0.5*** | (0.3-0.6) |

Ref = reference value

\*  $p < 0.05$ , \*\*  $p < 0.01$ , \*\*\*  $p < 0.001$

**Notes:** Survey weights are applied to obtain weighted percentages. \***Plains:** Phnom Penh, Kampong Cham, Tbong Khmum, Kandal, Prey Veng, Svay Rieng, and Takeo; **Tonle Sap:** Banteay Meanchey, Kampong Chhnang, Kampong Thom, Pursat, Siem Reap, Battambang, Pailin, and Otdar Meanchey; **Coastal/sea:** Kampot, Kep, Preah Sihanouk, and Koh Kong; **Mountains:** Kampong Speu, Kratie, Preah Vihear, Stung Treng, Mondul Kiri, and Ratanak Kiri.

## Discussion

We analyzed the most recent 2021–2022 CDHS data to examine the relationship between health insurance coverage and receiving four or more ANC visits during pregnancy. Overall, 24.9% of women reported having health insurance coverage among women of reproductive age who gave birth within two years of the survey. This finding is slightly similar to lower-middle-income countries, where 27.3% of women had health insurance coverage [19]. This is higher than in low-income countries, where 7.9% of women have health insurance coverage [19]. However, lower than in upper-middle-income countries, 52.5% of women had health insurance coverage [19]. Since the formal launch of the Cambodia National Social Security Fund (NSSF) with the Health Insurance Scheme in 2008, the proportion of women with health insurance coverage has increased from 16% in 2014 to 22% in 2021–2022 [5]. This proportion exponentially increased due to the Royal Government of Cambodia’s implementation of the NSSF for all workers in the formal and informal sectors of the economy [10]. Moreover, it has plans to extend the healthcare benefits under the NSSF to the family members of the employees as well [16].

258 This study found that women with health insurance coverage were 1.6 times more likely to  
259 attend four or more ANC visits during pregnancy. Previous studies documented the positive  
260 relationship between health insurance and the number of ANC visits among women of  
261 reproductive age [8,9,19]. Health insurance eliminates the financial barrier to accessing maternal  
262 health services caused by out-of-pocket payments. It has a beneficial effect in reducing the  
263 number of low-birth-weight babies born and child mortality [17,21]. The result is more equitable  
264 access to care, potentially improving maternal health outcomes [9,19]. The MoH has since raised  
265 the minimum standard for ANC visits during pregnancy to at least four trips [20,22]. The  
266 dramatically significant increase in the highest prevalence of four or more ANC visits was an  
267 effort by the Royal Government of Cambodia, which has strengthened health facilities across the  
268 country, particularly in rural areas, improved infrastructure, provided essential medical  
269 equipment and supplies, increased the number of midwives, expanded antenatal care, and  
270 provided more skilled medical practitioners at childbirth to ensure safe delivery practices.  
271 Furthermore, to encourage early and routine ANC visits, the government is offering pregnant  
272 women a monetary incentive of 20 US dollars for each visit during a maximum of four ANC  
273 visits at any health facility with a contract with the National Social Security Fund (NSSF)  
274 [14,23].

275  
276 This study found that increased education and household wealth index increased the likelihood  
277 of four or more ANC visits. Women with education and greater wealth index were more likely to  
278 attend four or more ANC visits. This aligns with previous evidence around socio-economic  
279 inequalities in maternal health service utilization in Cambodia and South Asia [24,25]. Education  
280 can increase women's awareness of the importance of ANC, while higher wealth can provide the  
281 financial means and access necessary to attend at least four ANC visits [26]. Additionally,  
282 education gives women the power to decide whether to seek medical attention and enables them  
283 to recognize warning signs of pregnancy complications. Moreover, women from higher-income  
284 households were more likely to be able to cover the costs of care-seeking, including any related  
285 expenses and transportation [24,25]. Thus, in this study, women with higher education levels and  
286 household wealth indexes had the highest proportion of health insurance coverage.

287

288 This study has several strengths. First, it used the most recent women’s data from the 2021–2022  
289 CDHS, an extensive representative national population-based household survey with a high  
290 response rate of 97%. Second, the recall bias has been minimized by limiting the analysis to the  
291 women's most recent deliveries within the last two years preceding the survey [5]. Third, the  
292 complex survey design and sampling weights were incorporated into the analysis of descriptive  
293 statistics, Chi-square test, and Logistic regression model, which enabled us to generalize our  
294 findings to the population of WRA in Cambodia. In addition, DHS data were collected using  
295 validated survey methods and highly trained data collectors, contributing to improved data  
296 quality [27]. Last, to our knowledge, this is the first study to report the association between  
297 health insurance coverage and ANC visits in Cambodia. After controlling for sociodemographic  
298 factors, we found significant associations between health insurance coverage and attendance at  
299 four or more ANC visits.

300 Despite this, there are several limitations. First, this study used a secondary analysis, so it did not  
301 address health institution factors of antenatal care utilization and service availability; hence, this  
302 study could not explore the quality of ANC services, though the quality of healthcare services  
303 plays a vital role in patient satisfaction and use. Second, the study's cross-sectional nature could  
304 not assist in the temporal relationship of variables including the number of years since women  
305 joined health insurance on ANC utilization. Therefore, further study should be conducted to  
306 identify factors related to health institutions. In addition, antenatal care utilization should be  
307 performed based on the new WHO guidelines revised in 2016 at the national level [22].  
308 Moreover, longitudinal studies that address comprehensive variables should be studied. Third,  
309 we excluded other factors, such as maternal complications and women's empowerment indicators,  
310 that could affect the use of maternal care. Lastly, CDHS did not assess a direct measure of  
311 maternal health literacy.

312

### 313 **Conclusion**

314

315 This is the first study to report the association between health insurance coverage and ANC visits  
316 in the healthcare setting in Cambodia. Cambodian pregnant women attend four or more antenatal  
317 care visits, which is slightly high. However, it still needs to be satisfactory. Health insurance  
318 coverage among women in Cambodia is relatively low. Moreover, we found that women with

319 health insurance, women with education, and being rich in the wealth quintile were strong  
320 predictors of women attending four or more ANC visits. There is a need to pay close attention to  
321 improving the uptake of health insurance among women of reproductive age, especially targeting  
322 women with no education, from low-income families, and women who reside in rural areas.  
323 Policymakers may need to prioritize women of reproductive age in designing and implementing  
324 health insurance programs to increase their uptake. This would provide financial risk protection,  
325 facilitate access to maternal health services, and possible attainment of Cambodia's SDG 3  
326 targets.

327

### 328 **Acknowledgments**

329 The authors would like to thank DHS-ICF, who approved the data used for this paper.

330

### 331 **References**

- 332 1. National Institute of Statistics, Directorate General for Health, and ICF International. Cambodia  
333 Demographic and Health Survey 2014. Phnom Penh, Cambodia, and Rockville, Maryland, USA: National  
334 Institute of Statistics, Directorate General for Health, and ICF International. Available online:  
335 <https://dhsprogram.com/pubs/pdf/fr312/fr312.pdf>. 2015.
- 336 2. National Institute of Statistics PP, Cambodia, Ministry of Health Phnom Penh, Cambodia, The  
337 DHS Program, ICF, Rockville, Maryland, USA. Cambodia Demographic and Health Survey 2021–22.  
338 Phnom Penh, Cambodia, and Rockville, Maryland, USA: NIS, MoH, and ICF. 2022. Available from:  
339 <https://dhsprogram.com/pubs/pdf/FR377/FR377.pdf>.
- 340 3. The United Nations Development Programme. The Sustainable Development Goals by 2016-  
341 2030. Available from: <https://www.undp.org/content/undp/en/home/sustainable-development-goals.html>.
- 342 4. Acuin CS, Khor GL, Liabsuetrakul T, Achadi EL, Htay TT, Firestone R, et al. Maternal, neonatal,  
343 and child health in southeast Asia: towards greater regional collaboration. *Lancet*. 2011;377(9764):516-25.  
344 Epub 20110125. doi: 10.1016/s0140-6736(10)62049-1. PubMed PMID: 21269675; PubMed Central  
345 PMCID: PMC7159081.
- 346 5. National Institute of Statistics (NIS) MoHM, and ICF. . Cambodia Demographic and Health  
347 Survey 2021–22 Final Report. Phnom Penh, Cambodia, and Rockville, Maryland, USA: NIS, MoH, and  
348 ICF. 2023. Available from: <https://dhsprogram.com/pubs/pdf/PR136/PR136.pdf>.
- 349 6. Merga BT, Raru TB, Deressa A, Regassa LD, Gamachu M, Negash B, et al. The effect of health  
350 insurance coverage on antenatal care utilizations in Ethiopia: evidence from national survey. *Front Health*  
351 *Serv*. 2023;3:1101164. Epub 20231006. doi: 10.3389/frhs.2023.1101164. PubMed PMID: 37869683;  
352 PubMed Central PMCID: PMC7159081.
- 353 7. Aboagye RG, Okyere J, Ahinkorah BO, Seidu AA, Zegeye B, Amu H, et al. Health insurance  
354 coverage and timely antenatal care attendance in sub-Saharan Africa. *BMC Health Serv Res*.  
355 2022;22(1):181. Epub 20220211. doi: 10.1186/s12913-022-07601-6. PubMed PMID: 35148769; PubMed  
356 Central PMCID: PMC7159081.
- 357 8. Wang W, Gheda Temsah, and Lindsay Mallick. . Health Insurance Coverage and Its Impact on  
358 Maternal Health Care Utilization in Low- and Middle-Income Countries. DHS Analytical Studies No. 45.  
359 Rockville, Maryland, USA: ICF International. . 2014.

- 360 9. Ahuru RR, Omon IJ, Nzopotam CI, Ekomoedor E. Health insurance ownership and maternal  
361 health service uptake among Nigerian women. *HEALTH*. 2021;12.
- 362 10. National Institute of Statistics. Ministry of Planning. General population census of the Kingdom  
363 of Cambodia 2019. Available from:  
364 [https://www.nis.gov.kh/nis/Census2019/Final%20General%20Population%20Census%202019-  
365 English.pdf](https://www.nis.gov.kh/nis/Census2019/Final%20General%20Population%20Census%202019-English.pdf).
- 366 11. The World Bank In Cambodia. Overview 2019. Available from:  
367 <https://www.worldbank.org/en/country/cambodia/overview>.
- 368 12. World Health Organization (WHO). Global Health Expenditure Database 2019. Available from:  
369 [https://apps.who.int/nha/database/PHC\\_Country\\_profile/Index/en](https://apps.who.int/nha/database/PHC_Country_profile/Index/en).
- 370 13. World Health Organization (WHO); World Bank and WHO. Half the world lacks access to  
371 essential health services, 100 million still pushed into extreme poverty because of health expenses 2017.  
372 2017. Available from: <http://www.who.int/mediacentre/news/releases/2017/half-lacks-access/en/>.
- 373 14. National Social Security Fund (NSSF). Health Insurance Scheme 2016. Available from:  
374 <https://www.nssf.gov.kh/health-care-scheme-2/>.
- 375 15. Nakamura H, Amimo F, Yi S, Tuot S, Yoshida T, Tobe M, et al. Implementing a sustainable health  
376 insurance system in Cambodia: a study protocol for developing and validating an efficient household  
377 income-level assessment model for equitable premium collection. *Int J Equity Health*. 2020;19(1):17.  
378 Epub 20200131. doi: 10.1186/s12939-020-1126-8. PubMed PMID: 32005237; PubMed Central PMCID:  
379 PMC695079.
- 380 16. The Royal Government of Cambodia. National Social Protection Policy Framework 2016–2025.  
381 Phnom Penh: The Council of Ministers; 2017.
- 382 17. Likka MH, Handalo DM, Weldsilase YA, Sinkie SO. The effect of community-based health  
383 insurance schemes on utilization of healthcare services in low- and middle-income countries: a systematic  
384 review protocol of quantitative evidence. *JBIS Database System Rev Implement Rep*. 2018;16(3):653-61.  
385 doi: 10.11124/jbisrir-2017-003381. PubMed PMID: 29521866.
- 386 18. Dadjo J, Ahinkorah BO, Yaya S. Health insurance coverage and antenatal care services utilization  
387 in West Africa. *BMC Health Serv Res*. 2022;22(1):311. Epub 20220307. doi: 10.1186/s12913-022-07698-  
388 9. PubMed PMID: 35255895; PubMed Central PMCID: PMC6899447.
- 389 19. Hooley B, Afriyie DO, Fink G, Tediosi F. Health insurance coverage in low-income and middle-  
390 income countries: progress made to date and related changes in private and public health expenditure.  
391 *BMJ Glob Health*. 2022;7(5). doi: 10.1136/bmjgh-2022-008722. PubMed PMID: 35537761; PubMed  
392 Central PMCID: PMC69092126.
- 393 20. Ministry of Health. Guideline for implementation the service package of Antenatal Care Delivery  
394 and Post natal Care 2019 [updated 2019]. 3:[Available from:  
395 [https://niph.org.kh/niph/uploads/library/pdf/GL220\\_NMCHC\\_anc\\_pnc\\_package\\_eng.pdf](https://niph.org.kh/niph/uploads/library/pdf/GL220_NMCHC_anc_pnc_package_eng.pdf).
- 396 21. Imo CK, De Wet-Billings N, Isiugo-Abanihe UC. The impact of maternal health insurance  
397 coverage and adequate healthcare services utilisation on the risk of under-five mortality in Nigeria: a  
398 cross-sectional study. *Arch Public Health*. 2022;80(1):206. Epub 20220913. doi: 10.1186/s13690-022-  
399 00968-2. PubMed PMID: 36100949; PubMed Central PMCID: PMC69472384.
- 400 22. WHO Guidelines Approved by the Guidelines Review Committee. WHO Recommendations on  
401 Antenatal Care for a Positive Pregnancy Experience. Geneva: World Health Organization
- 402 Copyright © World Health Organization 2016.; 2016.
- 403 23. Ministry of Information. Government Raises Allowances For Mothers And Children. Available  
404 from: <https://www.information.gov.kh/articles/108509>.
- 405 24. Chham S, Radovich E, Buffel V, Ir P, Wouters E. Determinants of the continuum of maternal  
406 health care in Cambodia: an analysis of the Cambodia demographic health survey 2014. *BMC Pregnancy  
407 Childbirth*. 2021;21(1):410. Epub 20210602. doi: 10.1186/s12884-021-03890-7. PubMed PMID:  
408 34078318; PubMed Central PMCID: PMC68170811.

- 409 25. Lee HY, Oh J, Kim R, Subramanian SV. Long-term trend in socioeconomic inequalities and  
410 geographic variation in the utilization of antenatal care service in India between 1998 and 2015. *Health*  
411 *Serv Res.* 2020;55(3):419-31. Epub 20200304. doi: 10.1111/1475-6773.13277. PubMed PMID: 32133652;  
412 PubMed Central PMCID: PMCPMC7240766.
- 413 26. Thakkar N, Alam P, Saxena D. Factors associated with underutilization of antenatal care in India:  
414 Results from 2019-2021 National Family Health Survey. *PLoS One.* 2023;18(5):e0285454. Epub  
415 20230508. doi: 10.1371/journal.pone.0285454. PubMed PMID: 37155665; PubMed Central PMCID:  
416 PMCPMC10166529.
- 417 27. Allen C, Fleuret J, Ahmed J, editors. Data quality in demographic and health surveys that used  
418 long and short questionnaires2020: ICF.

419
